# Supplementary material for: Organic semiconductors with a charge carrier life time of over 2 hours at room temperature
Source: Royal Society of Chemistry journal article supplement (doi:10.1039/c5tc02678d), 2015-01-01
Supplement: c5tc02678d1.pdf [file c5tc02678d1.pdf]

# Organic semiconductors with a charge carrier life time of over 2 hours at room temperature.

Yang Liu<sup>1</sup> (刘洋), Roderick. C. I. Mackenzie<sup>3</sup>, Bin Xu (徐斌)<sup>1</sup>, Yajun Gao (高亚军)<sup>1,2</sup>, Miquel Gimeno-Fabra<sup>3</sup>, David Grant<sup>3</sup>, Paul. H. M. van Loosdrecht<sup>1,2,4</sup>, and Wenjing Tian (田文晶)<sup>1</sup>

1. State Key Laboratory of Supramolecular Structures and Materials, Jilin University, 2699 Qianjin Street, Changchun 130012, China

2. Optical Condensed Matter Physics, Zernike Institute for Advanced Materials, University of Groningen, Nijenborgh 4, 9747AG Groningen, The Netherlands.

3. Faculty of Engineering, The University of Nottingham, University Park, Nottingham, NG7 2RD, UK

4. II. Physikalisches Institut, University of Cologne, Zùlpicher Strasse 77, 50937 Cologne, Germany.

## **S1. Depositing of Al<sub>2</sub>O<sub>3</sub> film**

Coatings were fabricated by first coating the ITO Teer Coatings UDP 650 closed field unbalanced magnetron-assisted physical vapour deposition (PVD) system of base pressure <math>3 \times 10^{-5}</math> Torr. A 57 mm diameter Al<sub>2</sub>O<sub>3</sub> target was sputtered using Ar as a working gas at ca.  $2 \times 10^{-3}$  Torr and 41 sccm. The RF power applied to the target was 100W for a period of 4 h with an applied negative bias on the substrate of -25 V.

## **S2. Experimentally determining the permittivity of the insulators**

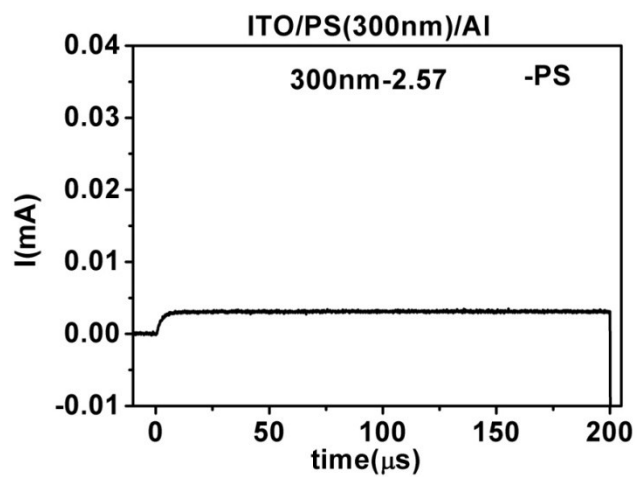

Figure S1: Current transient for a ITO/PS/Al device.

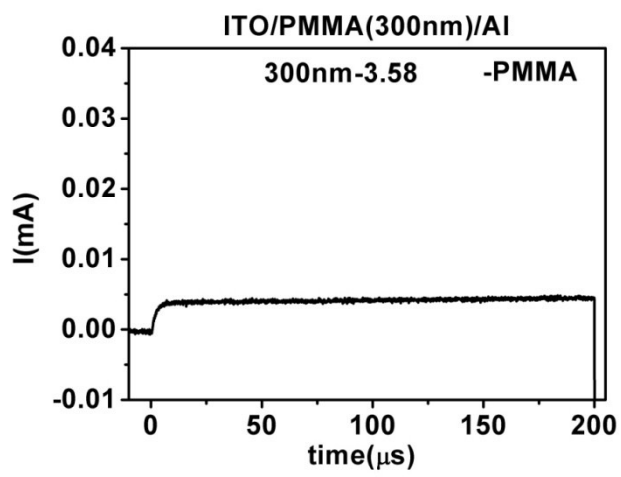

Figure S2: Current transient for a ITO/PMMA/Al device.

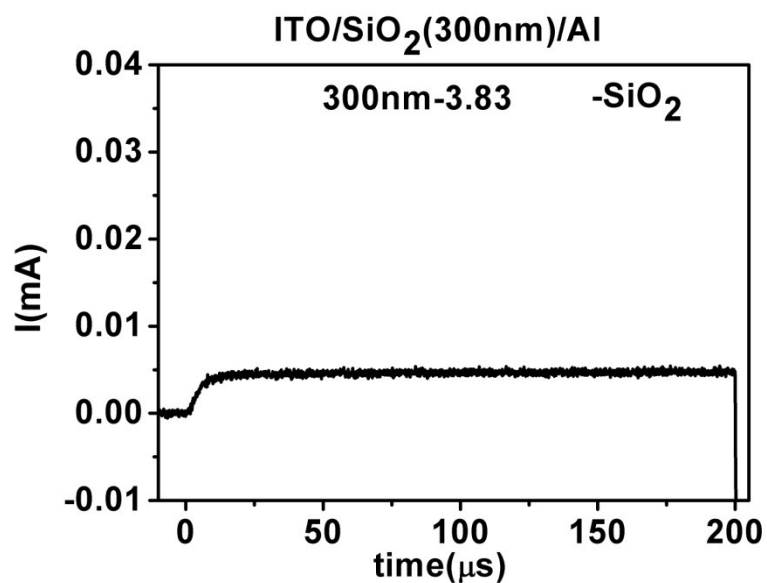

Figure S3: Current transient for a ITO/SiO<sub>2</sub>/Al device.

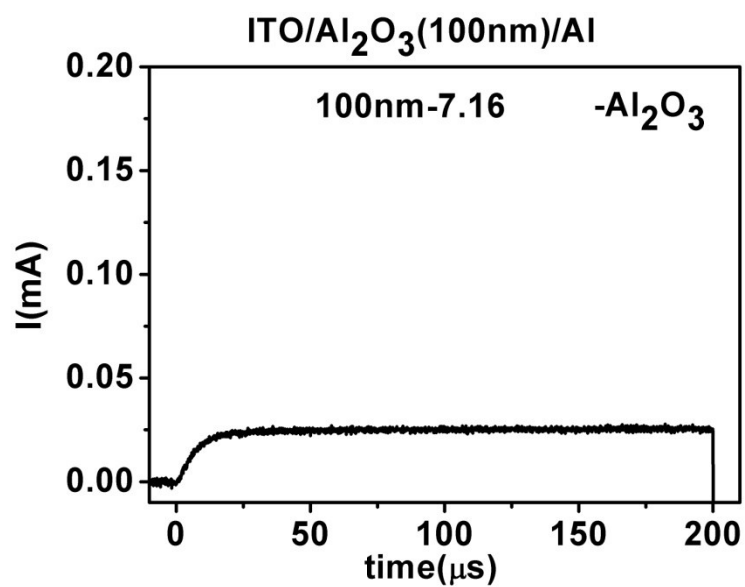

Figure S4: Current transient for a ITO/Al<sub>2</sub>O<sub>3</sub>/Al device.

### S3. Encapsulating and not encapsulating the device

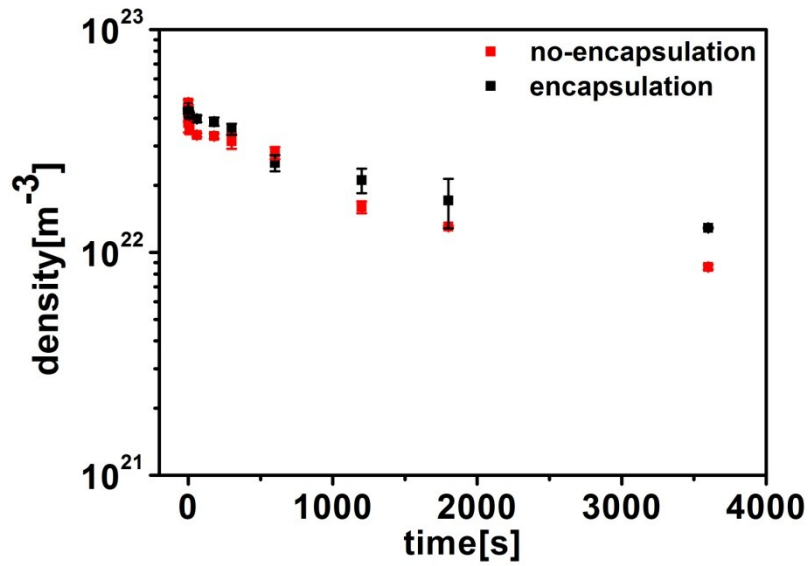

Figure S5: Influence of not-encapsulated (red) and encapsulated (black) the device on charge carrier life time.

### S4. Full transients from different semiconductors

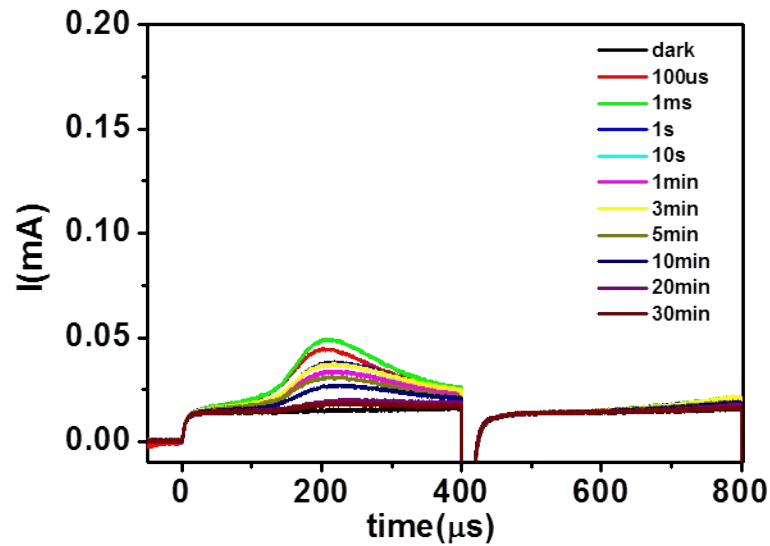

Figure S6: ITO/SiO<sub>2</sub>(100nm)/Spiro-OMeTAD(100nm)/Al

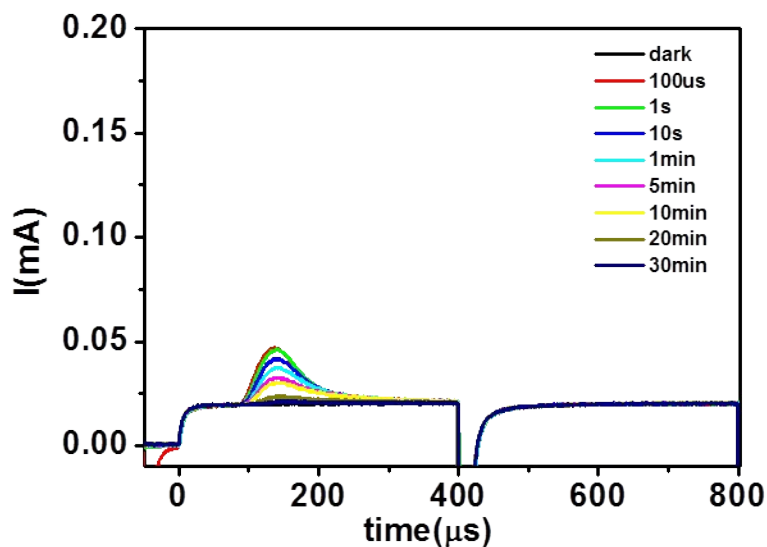

Figure S7: ITO/SiO<sub>2</sub>(100nm)/TAPC(100nm)/Al

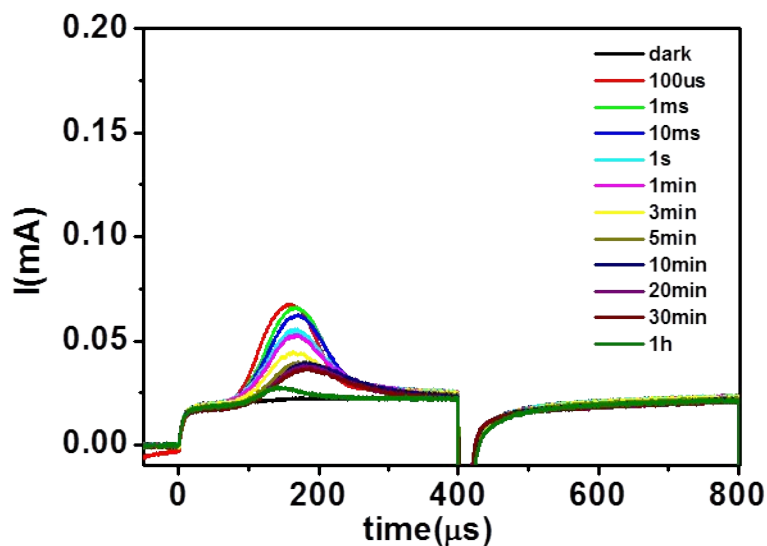

Figure S8: ITO/SiO<sub>2</sub>(100nm)/TPD(100nm)/Al

#### S4. Modeling

A free copy of the model used to perform the simulations in this paper (figure 7b) can be downloaded at [www.opvdm.com](http://www.opvdm.com). The model is a drift diffusion model which describes recombination using a SRH formalism.

#### S5. Doping in organic semiconductors

In classical inorganic electronics, one would say a material is pure and undoped if it had a purity

of 99.9999999% (or nine nines purity). The atomic density of silicon is around  $5 \times 10^{28}$  atoms/m<sup>3</sup>, this means in nominally undoped silicon there are  $5 \times 10^{19}$  dopant atoms per m<sup>3</sup>. In contrast, a highly doped inorganic semiconductor has around  $1 \times 10^{25}$  dopant atoms per m<sup>3</sup>. If one now considers organic semiconductors, a material is considered 'pure' if it has a purity of only 99.9%. If we use fullerene for this example, and assume it is a square box with the volume of 1nm \* 1nm \* 1nm it will have a density of  $1 \times 10^{27}$  molecules per m<sup>3</sup>, if we then assume it is 99.9% pure, we can then calculate that it has a dopant density of  $1 \times 10^{24}$  atoms per m<sup>3</sup>. Thus from these simple calculations, it can be seen that even a 'pure' organic semiconductor is doped almost as much as a highly doped inorganic semiconductor. This simply highlights how contaminated organic semiconductors are when viewed from the inorganic semiconductor stand point and this is the reason why all organic semiconductors studied produced long life times when placed in our device structure.
